# Supplementary material for: Regulating the effects of GPR21, a novel target for type 2 diabetes
Source: PubMed Central journal article supplement (PMC4886680; doi:10.1038/srep27002), 2016-05-31
Supplement: srep27002-s1.pdf [file srep27002-s1.pdf]

## Regulating the effects of GPR21, a novel target for type 2 diabetes

Siobhán Leonard<sup>1,\*</sup>, Gemma K. Kinsella<sup>1,#</sup>, Elisa Benetti<sup>2</sup> and John B. C. Findlay<sup>1</sup>

<sup>1</sup>Department of Biology, National University of Ireland Maynooth, Maynooth, Co. Kildare, Ireland

<sup>2</sup>Department of Drug Science and Technology, University of Turin, Turin, Italy

<sup>#</sup>Current address: School of Food Science and Environmental Health, College of Sciences and Health, Dublin Institute of Technology, Cathal Brugha Street, Dublin 1, Ireland

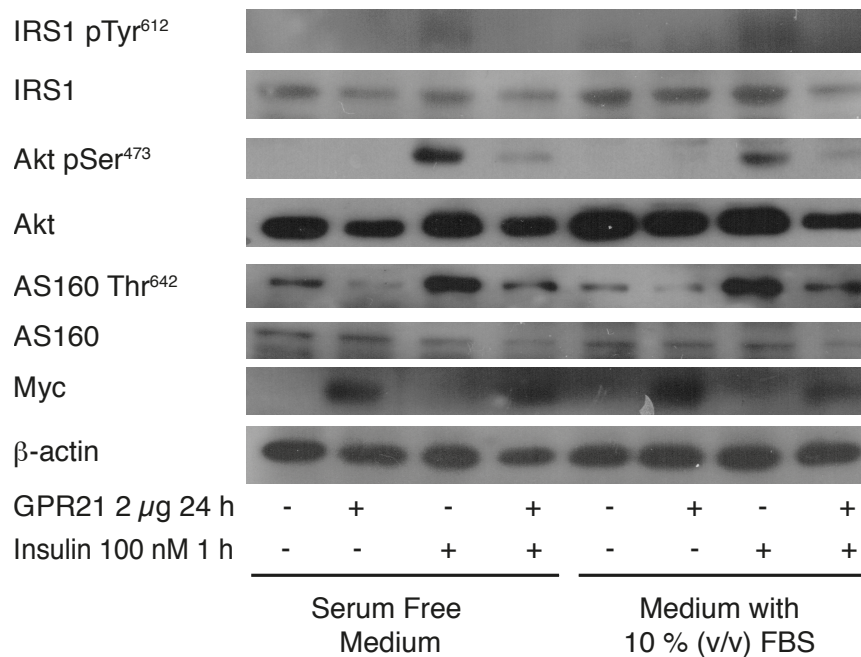

### Supplementary Figure S1. Analysis of the effect of GPR21 on insulin signalling

**in CHO cells.** CHO cells transiently transfected with pCMV6-Entry or GPR21 were incubated for 24 h in the presence or absence of 10 % (v/v) FBS, then stimulated with 100 nM insulin for 1 h. Cells were lysed and subjected to SDS-PAGE followed by immunoblotting with antibodies against phospho-IRS1 Tyr<sup>612</sup>, IRS1, phospho-Akt Ser<sup>473</sup>, Akt, phospho-AS160 Thr<sup>642</sup>, AS160, myc and β-actin.
